# Supplementary material for: Las inversiones españolas en el exterior: siete años después
Source: MDPI journal article supplement (doi:10.3390/nu13072142), 1980-01-01
Supplement: s1 [file s1]

**Supplemental Material 2.** Pediatricians' original questionnaire with English translation in blue.

**Professionnels de santé**  
**« La diversification alimentaire »**  
**Healthcare professionals**  
**"Complementary feeding"**

Dans le cadre d'un programme de recherche mené par l'INRA, ce questionnaire a pour objectif de décrire la manière dont les professionnels de santé abordent la diversification alimentaire avec les parents. Ce sondage ne devrait vous prendre que 15 minutes. Vos réponses seront anonymes et votre participation est entièrement libre. D'avance, nous vous remercions de votre aide.

Pour commencer, cliquez s'il vous plaît sur le bouton "Suivant".

Veuillez cocher pour indiquer votre réponse.

As part of a research program led by INRA, this questionnaire aims to describe the way in which healthcare professionals approach complementary feeding with parents. This survey should only take you 15 minutes to complete. Your answers will be anonymous and your participation is completely free. In advance, we thank you for your help.

To get started, please click on the "Next" button.

Please tick to indicate your answer.

**1. Données démographiques**

**1. Demographic data**

|     |                                                                |                                                                                                                                                                                                                                                                                                                                                                                                                                                                                                            |
|-----|----------------------------------------------------------------|------------------------------------------------------------------------------------------------------------------------------------------------------------------------------------------------------------------------------------------------------------------------------------------------------------------------------------------------------------------------------------------------------------------------------------------------------------------------------------------------------------|
| 1.1 | Quelle est votre profession ?<br><br>What is your profession ? | <input type="checkbox"/> Médecin généraliste<br><input type="checkbox"/> Pédiatre<br><input type="checkbox"/> Infirmier/ère<br>puériculteur/trice<br><input type="checkbox"/> Personnel de PMI ou<br>d'établissement d'accueil des<br>jeunes enfants : auxiliaire de<br>puériculture, aide soignant,<br>éducateur de jeunes enfants,<br>autre<br><input type="checkbox"/> Diététicien/ne<br><input type="checkbox"/> Sage-femme/Maïeuticien<br><input type="checkbox"/> Autre (veuillez préciser)<br>..... |
|-----|----------------------------------------------------------------|------------------------------------------------------------------------------------------------------------------------------------------------------------------------------------------------------------------------------------------------------------------------------------------------------------------------------------------------------------------------------------------------------------------------------------------------------------------------------------------------------------|

|     |                                                                                                                         |                                                                                                                                                                                                                                                                                                                                                                                                                                  |
|-----|-------------------------------------------------------------------------------------------------------------------------|----------------------------------------------------------------------------------------------------------------------------------------------------------------------------------------------------------------------------------------------------------------------------------------------------------------------------------------------------------------------------------------------------------------------------------|
|     |                                                                                                                         | <input type="checkbox"/> General practitioner<br><input type="checkbox"/> Pediatrician<br><input type="checkbox"/> Pediatric nurse<br><input type="checkbox"/> PMI or young childcare establishment staff: childcare assistant, caregiver, educator of young children, other<br><input type="checkbox"/> Dietitian<br><input type="checkbox"/> Midwife / Maieutician<br><input type="checkbox"/> Other (please specify)<br>..... |
| 1.2 | Depuis combien d'années exercez-vous cette profession ?<br><br>Since how many years have you practiced this profession? | <input type="checkbox"/> 0-10 ans<br><input type="checkbox"/> 11-20 ans<br><input type="checkbox"/> 21-30 ans<br><input type="checkbox"/> >30 ans<br><input type="checkbox"/> 0-10 years<br><input type="checkbox"/> 11-20 years<br><input type="checkbox"/> 21-30 years<br><input type="checkbox"/> >30 years                                                                                                                   |
| 1.3 | Quel âge avez-vous ?<br><br>How old are you?                                                                            | <input type="checkbox"/> ≤ 30 ans<br><input type="checkbox"/> 31-40 ans<br><input type="checkbox"/> 41-50 ans<br><input type="checkbox"/> 51-60 ans<br><input type="checkbox"/> ≥ 61 ans<br><input type="checkbox"/> ≤ 30 years old<br><input type="checkbox"/> 31-40 years old<br><input type="checkbox"/> 41-50 years old<br><input type="checkbox"/> 51-60 years old<br><input type="checkbox"/> ≥ 61 years old               |
| 1.4 | Êtes-vous... ?<br><br>Are you...?                                                                                       | <input type="checkbox"/> un homme<br><input type="checkbox"/> une femme<br><input type="checkbox"/> man<br><input type="checkbox"/> woman                                                                                                                                                                                                                                                                                        |
| 1.5 | Où travaillez-vous ?<br><br>Where do you work?                                                                          | <input type="checkbox"/> zone urbaine<br><input type="checkbox"/> zone rurale<br><input type="checkbox"/> Urban area<br><input type="checkbox"/> Rural area                                                                                                                                                                                                                                                                      |
| 1.6 | Quel est votre code postal ?<br><br>What is your postal code?                                                           | .....                                                                                                                                                                                                                                                                                                                                                                                                                            |

|     |                                                                                                                             |                                                                                                                       |
|-----|-----------------------------------------------------------------------------------------------------------------------------|-----------------------------------------------------------------------------------------------------------------------|
| 1.7 | Avez-vous vous même des enfants ?<br><br>Do you have children?                                                              | <input type="checkbox"/> Oui <input type="checkbox"/> Non<br><input type="checkbox"/> Yes <input type="checkbox"/> No |
| 1.8 | En quelles années sont nés vos premiers et derniers enfants ?<br><br>In which years were your first and last children born? | 1 <sup>er</sup> enfant ____<br>Dernier enfant ____<br>First child ____<br>Last child ____                             |

## 2. Attitudes et perceptions

### 2. Attitudes and perceptions

|     |                                                                                                                                                                                                                                             |                                                                                                                                                                                                                                                                                                                                                                                                                                                             |
|-----|---------------------------------------------------------------------------------------------------------------------------------------------------------------------------------------------------------------------------------------------|-------------------------------------------------------------------------------------------------------------------------------------------------------------------------------------------------------------------------------------------------------------------------------------------------------------------------------------------------------------------------------------------------------------------------------------------------------------|
|     | Indiquez dans quelle mesure vous êtes d'accord avec les affirmations suivantes<br>Indicate the extent to which you agree with the following statements                                                                                      |                                                                                                                                                                                                                                                                                                                                                                                                                                                             |
| 2.1 | Conseiller les parents sur la diversification alimentaire est l'une de mes responsabilités.<br><br>Advising parents on complementary feeding is one of my responsibilities.                                                                 | <input type="checkbox"/> Tout à fait d'accord<br><input type="checkbox"/> D'accord<br><input type="checkbox"/> Ni en désaccord, ni d'accord<br><input type="checkbox"/> Pas d'accord<br><input type="checkbox"/> Pas du tout d'accord<br><input type="checkbox"/> Totally agree<br><input type="checkbox"/> Agree<br><input type="checkbox"/> Neither disagree nor agree<br><input type="checkbox"/> Disagree<br><input type="checkbox"/> Strongly disagree |
| 2.2 | La diversification alimentaire est une étape importante pour le développement équilibré des nourrissons.<br><br>Complementary feeding is an important step for the balanced development of infants.                                         | <input type="checkbox"/> Tout à fait d'accord<br><input type="checkbox"/> D'accord<br><input type="checkbox"/> Ni en désaccord, ni d'accord<br><input type="checkbox"/> Pas d'accord<br><input type="checkbox"/> Pas du tout d'accord<br><input type="checkbox"/> Totally agree<br><input type="checkbox"/> Agree<br><input type="checkbox"/> Neither disagree nor agree<br><input type="checkbox"/> Disagree<br><input type="checkbox"/> Strongly disagree |
| 2.3 | La diversification alimentaire est une étape importante pour l'acquisition de bonnes habitudes alimentaires chez les nourrissons.<br><br>Complementary feeding is an important step in the acquisition of healthy eating habits in infants. | <input type="checkbox"/> Tout à fait d'accord<br><input type="checkbox"/> D'accord<br><input type="checkbox"/> Ni en désaccord, ni d'accord<br><input type="checkbox"/> Pas d'accord<br><input type="checkbox"/> Pas du tout d'accord<br><input type="checkbox"/> Totally agree<br><input type="checkbox"/> Agree<br><input type="checkbox"/> Neither disagree nor agree                                                                                    |

|     |                                                                                                                                                                                                                                                                                          |                                                                                                                                                                                                                                                                                                                                                                                                                                                             |
|-----|------------------------------------------------------------------------------------------------------------------------------------------------------------------------------------------------------------------------------------------------------------------------------------------|-------------------------------------------------------------------------------------------------------------------------------------------------------------------------------------------------------------------------------------------------------------------------------------------------------------------------------------------------------------------------------------------------------------------------------------------------------------|
|     |                                                                                                                                                                                                                                                                                          | <input type="checkbox"/> Disagree<br><input type="checkbox"/> Strongly disagree                                                                                                                                                                                                                                                                                                                                                                             |
| 2.4 | <p>Conseiller les parents sur la diversification alimentaire est efficace pour leur faire adopter des pratiques alimentaires saines pour leur enfant.</p> <p>Counseling parents on complementary feeding is effective in making them adopt healthy eating practices for their child.</p> | <input type="checkbox"/> Tout à fait d'accord<br><input type="checkbox"/> D'accord<br><input type="checkbox"/> Ni en désaccord, ni d'accord<br><input type="checkbox"/> Pas d'accord<br><input type="checkbox"/> Pas du tout d'accord<br><input type="checkbox"/> Totally agree<br><input type="checkbox"/> Agree<br><input type="checkbox"/> Neither disagree nor agree<br><input type="checkbox"/> Disagree<br><input type="checkbox"/> Strongly disagree |
| 2.5 | <p>Je me sens à l'aise pour conseiller les parents sur la diversification alimentaire.</p> <p>I feel comfortable advising parents on complementary feeding.</p>                                                                                                                          | <input type="checkbox"/> Tout à fait d'accord<br><input type="checkbox"/> D'accord<br><input type="checkbox"/> Ni en désaccord, ni d'accord<br><input type="checkbox"/> Pas d'accord<br><input type="checkbox"/> Pas du tout d'accord<br><input type="checkbox"/> Totally agree<br><input type="checkbox"/> Agree<br><input type="checkbox"/> Neither disagree nor agree<br><input type="checkbox"/> Disagree<br><input type="checkbox"/> Strongly disagree |
| 2.6 | <p>Je pense que les parents veulent plus d'informations sur la diversification alimentaire que ce que je suis en mesure de leur fournir.</p> <p>I think parents want more information on complementary feeding than what I can provide them with.</p>                                    | <input type="checkbox"/> Tout à fait d'accord<br><input type="checkbox"/> D'accord<br><input type="checkbox"/> Ni en désaccord, ni d'accord<br><input type="checkbox"/> Pas d'accord<br><input type="checkbox"/> Pas du tout d'accord<br><input type="checkbox"/> Totally agree<br><input type="checkbox"/> Agree<br><input type="checkbox"/> Neither disagree nor agree<br><input type="checkbox"/> Disagree<br><input type="checkbox"/> Strongly disagree |
| 2.7 | <p>Je pense avoir suffisamment de connaissances sur la nutrition infantile et la diversification alimentaire.</p> <p>I think I have enough knowledge about infant nutrition and complementary feeding.</p>                                                                               | <input type="checkbox"/> Tout à fait d'accord<br><input type="checkbox"/> D'accord<br><input type="checkbox"/> Ni en désaccord, ni d'accord<br><input type="checkbox"/> Pas d'accord<br><input type="checkbox"/> Pas du tout d'accord<br><input type="checkbox"/> Totally agree<br><input type="checkbox"/> Agree<br><input type="checkbox"/> Neither disagree nor agree                                                                                    |

|     |                                                                                                                                                                                                                                                                                                      |                                                                                                                                                                                                                                                                                                                                                                                                                                                                                                                                                                                                                                                                                                                                                                                                                                                                                                                                                                                                                                                                                                                                                                                                                 |
|-----|------------------------------------------------------------------------------------------------------------------------------------------------------------------------------------------------------------------------------------------------------------------------------------------------------|-----------------------------------------------------------------------------------------------------------------------------------------------------------------------------------------------------------------------------------------------------------------------------------------------------------------------------------------------------------------------------------------------------------------------------------------------------------------------------------------------------------------------------------------------------------------------------------------------------------------------------------------------------------------------------------------------------------------------------------------------------------------------------------------------------------------------------------------------------------------------------------------------------------------------------------------------------------------------------------------------------------------------------------------------------------------------------------------------------------------------------------------------------------------------------------------------------------------|
|     |                                                                                                                                                                                                                                                                                                      | <input type="checkbox"/> Disagree<br><input type="checkbox"/> Strongly disagree                                                                                                                                                                                                                                                                                                                                                                                                                                                                                                                                                                                                                                                                                                                                                                                                                                                                                                                                                                                                                                                                                                                                 |
| 2.8 | <p>Au cours des dernières années, avez-vous acquis de nouvelles connaissances sur la diversification alimentaire ?</p> <p>Over the past years, did you acquire new knowledge regarding complementary feeding?</p>                                                                                    | <input type="checkbox"/> Oui<br><input type="checkbox"/> Non<br><input type="checkbox"/> Yes<br><input type="checkbox"/> No                                                                                                                                                                                                                                                                                                                                                                                                                                                                                                                                                                                                                                                                                                                                                                                                                                                                                                                                                                                                                                                                                     |
| 2.9 | <p>Au cours des deux dernières années, comment avez-vous acquis de nouvelles connaissances sur la diversification alimentaire ?<br/>(plusieurs réponses possibles)</p> <p>Over the past two years, how did you acquire new knowledge about complementary feeding?<br/>(multiple answers allowed)</p> | <input type="checkbox"/> Formation professionnelle continue: réunions, congrès et/ou medias (journaux professionnels, sites internet professionnels, newsletters, etc.)<br><input type="checkbox"/> Brochures de santé publique (Santé Publique France, ARS, IREPS...)<br><input type="checkbox"/> Brochures des fabricants de laits ou aliments pour bébés<br><input type="checkbox"/> Événements organisés par des fabricants de laits ou aliments pour bébés<br><input type="checkbox"/> Blogs sur la nutrition, autres sites des réseaux de nutrition<br><input type="checkbox"/> Médias généralistes (radio, télévision, journaux, magazines)<br><input type="checkbox"/> Discussions avec des collègues<br><input type="checkbox"/> Autre (veuillez préciser)<br>.....<br><input type="checkbox"/> Continuing professional training : meetings, congresses and / or media (professional journals, professional websites, newsletters, etc.)<br><input type="checkbox"/> Public health brochures (Public Health France, ARS, IREPS, etc.)<br><input type="checkbox"/> Brochures from manufacturers of baby milk or food<br><input type="checkbox"/> Events organized by manufacturers of milk or baby food |

|      |                                                                                                                                                                                                                                                                                                                                                      |                                                                                                                                                                                                                                                                                                                                                                                                                                                                                                                                                                                                                                                                                                                                                                                                                                                                                                                                                                                                                                                                                                                                                                                                                                                                   |
|------|------------------------------------------------------------------------------------------------------------------------------------------------------------------------------------------------------------------------------------------------------------------------------------------------------------------------------------------------------|-------------------------------------------------------------------------------------------------------------------------------------------------------------------------------------------------------------------------------------------------------------------------------------------------------------------------------------------------------------------------------------------------------------------------------------------------------------------------------------------------------------------------------------------------------------------------------------------------------------------------------------------------------------------------------------------------------------------------------------------------------------------------------------------------------------------------------------------------------------------------------------------------------------------------------------------------------------------------------------------------------------------------------------------------------------------------------------------------------------------------------------------------------------------------------------------------------------------------------------------------------------------|
|      |                                                                                                                                                                                                                                                                                                                                                      | <input type="checkbox"/> Nutrition blogs, other nutrition network sites<br><input type="checkbox"/> General media (radio, television, newspapers, magazines)<br><input type="checkbox"/> Discussions with colleagues<br><input type="checkbox"/> Other (please specify)<br>.....                                                                                                                                                                                                                                                                                                                                                                                                                                                                                                                                                                                                                                                                                                                                                                                                                                                                                                                                                                                  |
| 2.10 | <p>Parmi les propositions suivantes, quelles sont selon vous les organismes chargés de formuler les recommandations officielles concernant la diversification alimentaire ?</p> <p>Among the following propositions, which organizations do you think are responsible for formulating official recommendations concerning complementary feeding?</p> | <input type="checkbox"/> Santé publique France<br><input type="checkbox"/> Sociétés savantes (Société française de Pédiatrie, Association de Pédiatrie Ambulatoire, Société Française de Nutrition, Académie de Médecine, autre)<br><input type="checkbox"/> ARS (Agence régionale de santé) / IREPS (Instance régionale d'Education et de Promotion de la Santé)<br><input type="checkbox"/> ANSES (Agence nationale de sécurité sanitaire de l'alimentation, de l'environnement et du travail)<br><input type="checkbox"/> Fabricants de laits et d'aliments pour bébés<br><input type="checkbox"/> Médias généralistes (radio, télévision, journaux, magazines)<br><input type="checkbox"/> Instituts de recherche / Universités<br><input type="checkbox"/> Public health France<br><input type="checkbox"/> Learned societies (French Society of Pediatrics, Association of Ambulatory Pediatrics, French Society of Nutrition, Academy of Medicine, other)<br><input type="checkbox"/> ARS (Regional Health Agency) / IREPS (Regional Authority for Education and Health Promotion)<br><input type="checkbox"/> ANSES (National Agency for Food, Environmental and Occupational Health Safety)<br><input type="checkbox"/> Milk and baby food manufacturers |

|      |                                                                                                                                                                                                                                                                                                                                                                                                                                                                                                                                                                                                                                                                                                                                                           |                                                                                                                                                  |
|------|-----------------------------------------------------------------------------------------------------------------------------------------------------------------------------------------------------------------------------------------------------------------------------------------------------------------------------------------------------------------------------------------------------------------------------------------------------------------------------------------------------------------------------------------------------------------------------------------------------------------------------------------------------------------------------------------------------------------------------------------------------------|--------------------------------------------------------------------------------------------------------------------------------------------------|
|      |                                                                                                                                                                                                                                                                                                                                                                                                                                                                                                                                                                                                                                                                                                                                                           | <input type="checkbox"/> General media (radio, television, newspapers, magazines)<br><input type="checkbox"/> Research institutes / Universities |
| 2.11 | <p>Hiérarchiser les freins pour donner des conseils aux parents sur la diversification alimentaire listés ci-dessous du plus contraignant au moins contraignant</p> <ul style="list-style-type: none"> <li>- le manque de temps</li> <li>- mes compétences en conseil</li> <li>- le manque d'intérêt de certains parents</li> <li>- le manque de matériel de communication approprié</li> </ul> <p>Prioritize the obstacles to give advice to parents on complementary feeding listed below from the most restrictive to the least restrictive</p> <ul style="list-style-type: none"> <li>- lack of time</li> <li>- my consulting skills</li> <li>- the lack of interest of some parents</li> <li>- lack of appropriate communication material</li> </ul> |                                                                                                                                                  |

### 3. Vos pratiques actuelles en matière de communication avec les parents

#### 3. Your current communication practices with parents

|     |                                                                                                                                                                                                                                                                                                                                                 |                                                                                                                                                                                                                                                                                                                                                                                                                                                                                                                                                                                                                                                                                                                                                               |
|-----|-------------------------------------------------------------------------------------------------------------------------------------------------------------------------------------------------------------------------------------------------------------------------------------------------------------------------------------------------|---------------------------------------------------------------------------------------------------------------------------------------------------------------------------------------------------------------------------------------------------------------------------------------------------------------------------------------------------------------------------------------------------------------------------------------------------------------------------------------------------------------------------------------------------------------------------------------------------------------------------------------------------------------------------------------------------------------------------------------------------------------|
| 3.1 | <p>Sur l'ensemble de vos consultations/RDV avec des parents de jeunes enfants (0-3 ans), à quelle fréquence conseillez-vous les parents sur la diversification alimentaire ?</p> <p>Over all of your consultations / appointments with parents of young children (0-3 years old), how often do you advise parents on complementary feeding?</p> | <input type="checkbox"/> Jamais<br><input type="checkbox"/> Uniquement si j'identifie que cela est nécessaire<br><input type="checkbox"/> Toujours<br><input type="checkbox"/> Never<br><input type="checkbox"/> Only if I identify that it is necessary<br><input type="checkbox"/> Always                                                                                                                                                                                                                                                                                                                                                                                                                                                                   |
| 3.2 | <p>Quel âge ont habituellement les nourrissons lorsque vous commencez à parler de la diversification alimentaire ?</p> <p>How old are infants usually when you start talking about complementary feeding?</p>                                                                                                                                   | <input type="checkbox"/> Avant la naissance<br><input type="checkbox"/> Peu après la naissance<br><input type="checkbox"/> 1 mois <input type="checkbox"/> 2 mois<br><input type="checkbox"/> 3 mois <input type="checkbox"/> 4 mois<br><input type="checkbox"/> 5 mois <input type="checkbox"/> 6 mois<br><input type="checkbox"/> 9 mois <input type="checkbox"/> 12 mois<br><input type="checkbox"/> Before birth<br><input type="checkbox"/> Soon after birth<br><input type="checkbox"/> 1 month <input type="checkbox"/> 2 months<br><input type="checkbox"/> 3 months <input type="checkbox"/> 4 months<br><input type="checkbox"/> 5 months <input type="checkbox"/> 6 months<br><input type="checkbox"/> 9 months <input type="checkbox"/> 12 months |

|     |                                                                                                                                                                                                                                                                                                 |                                                                                                                                                                                                                                                                                                                                                                                                                                                                                                                                                                                                                                                                                                                                                                                                                                                                                                                                             |
|-----|-------------------------------------------------------------------------------------------------------------------------------------------------------------------------------------------------------------------------------------------------------------------------------------------------|---------------------------------------------------------------------------------------------------------------------------------------------------------------------------------------------------------------------------------------------------------------------------------------------------------------------------------------------------------------------------------------------------------------------------------------------------------------------------------------------------------------------------------------------------------------------------------------------------------------------------------------------------------------------------------------------------------------------------------------------------------------------------------------------------------------------------------------------------------------------------------------------------------------------------------------------|
| 3.3 | <p>Quel âge ont habituellement les nourrissons lorsque vous parlez des étapes de la diversification alimentaire (introduction des groupes d'aliments,...) ?</p> <p>How old are infants usually when you talk about the stages of complementary feeding (introduction of food groups, etc.)?</p> | <input type="checkbox"/> 1 mois <input type="checkbox"/> 2 mois<br><input type="checkbox"/> 3 mois <input type="checkbox"/> 4 mois<br><input type="checkbox"/> 5 mois <input type="checkbox"/> 6 mois<br><input type="checkbox"/> 9 mois <input type="checkbox"/> 12 mois<br><input type="checkbox"/> 16 mois <input type="checkbox"/> 20 mois<br><input type="checkbox"/> 24 mois <input type="checkbox"/> 30 mois<br><input type="checkbox"/> 36 mois<br><input type="checkbox"/> 1 month <input type="checkbox"/> 2 months<br><input type="checkbox"/> 3 months <input type="checkbox"/> 4 months<br><input type="checkbox"/> 5 months <input type="checkbox"/> 6 months<br><input type="checkbox"/> 9 months <input type="checkbox"/> 12 months<br><input type="checkbox"/> 16 months <input type="checkbox"/> 20 months<br><input type="checkbox"/> 24 months <input type="checkbox"/> 30 months<br><input type="checkbox"/> 36 months |
| 3.4 | <p>Avec qui discutez-vous de la diversification alimentaire le plus souvent ?<br/>(plusieurs réponses possibles)</p> <p>Who do you the most often discuss complementary feeding with?<br/>(multiple answers allowed)</p>                                                                        | <input type="checkbox"/> Mère <input type="checkbox"/> Père<br><input type="checkbox"/> Autres membres de la famille<br>(veuillez préciser)<br>.....<br><input type="checkbox"/> Mother <input type="checkbox"/> Father<br><input type="checkbox"/> Other family members (please specify)<br>..... ..                                                                                                                                                                                                                                                                                                                                                                                                                                                                                                                                                                                                                                       |
| 3.5 | <p>De quelle manière abordez-vous la diversification alimentaire ?<br/>(plusieurs réponses possibles)</p> <p>How do you approach the topic of complementary feeding?<br/>(multiple answers allowed)</p>                                                                                         | <input type="checkbox"/> En discutant<br><input type="checkbox"/> En remettant des documents<br><input type="checkbox"/> En conseillant des sites internet<br><input type="checkbox"/> En m'appuyant sur le carnet de santé<br><input type="checkbox"/> Autre (veuillez préciser)<br><input type="checkbox"/> By discussing<br><input type="checkbox"/> By handing over documents<br><input type="checkbox"/> By advising websites<br><input type="checkbox"/> By relying on the health notebook<br><input type="checkbox"/> Other (please specify)                                                                                                                                                                                                                                                                                                                                                                                         |
| 3.6 | <p>À quelle fréquence donnez-vous des documents concernant la diversification alimentaire aux parents ?</p> <p>How often do you give documents about complementary feeding to parents?</p>                                                                                                      | <input type="checkbox"/> Jamais<br><input type="checkbox"/> Rarement<br><input type="checkbox"/> Parfois<br><input type="checkbox"/> Souvent<br><input type="checkbox"/> Toujours<br><input type="checkbox"/> Never<br><input type="checkbox"/> Rarely                                                                                                                                                                                                                                                                                                                                                                                                                                                                                                                                                                                                                                                                                      |

|     |                                                                                                                                                                                                                                                                                                  |                                                                                                                                                                                                                                                                                                                                                                                                                                                                                                                                                                                                                                                                                                                                                                                                                                                                                                                                                                                                                                                                                                                                                                                                                                                                                                                                                                                                                                                                                 |
|-----|--------------------------------------------------------------------------------------------------------------------------------------------------------------------------------------------------------------------------------------------------------------------------------------------------|---------------------------------------------------------------------------------------------------------------------------------------------------------------------------------------------------------------------------------------------------------------------------------------------------------------------------------------------------------------------------------------------------------------------------------------------------------------------------------------------------------------------------------------------------------------------------------------------------------------------------------------------------------------------------------------------------------------------------------------------------------------------------------------------------------------------------------------------------------------------------------------------------------------------------------------------------------------------------------------------------------------------------------------------------------------------------------------------------------------------------------------------------------------------------------------------------------------------------------------------------------------------------------------------------------------------------------------------------------------------------------------------------------------------------------------------------------------------------------|
|     |                                                                                                                                                                                                                                                                                                  | <input type="checkbox"/> Sometimes<br><input type="checkbox"/> Often<br><input type="checkbox"/> Always                                                                                                                                                                                                                                                                                                                                                                                                                                                                                                                                                                                                                                                                                                                                                                                                                                                                                                                                                                                                                                                                                                                                                                                                                                                                                                                                                                         |
| 3.7 | <p>Qui vous fournit les documents de communication sur la diversification alimentaire à remettre aux parents ?<br/> (plusieurs réponses possibles)</p> <p>Who provides you with the communication documents on complementary feeding to give to parents?<br/> (more than one answer allowed)</p> | <input type="checkbox"/> Santé publique France<br><input type="checkbox"/> PNNS<br><input type="checkbox"/> ARS<br><input type="checkbox"/> IREPS<br><input type="checkbox"/> CAF<br><input type="checkbox"/> Sociétés de pédiatrie (Société Française de Pédiatrie, Association de Pédiatrie Ambulatoire, Société Française de Nutrition, Académie de Médecine, autre)<br><input type="checkbox"/> Fabricants de laits et d'aliments pour bébés<br><input type="checkbox"/> Fabricants de matériel de puériculture (ex : tire-lait)<br><input type="checkbox"/> Conseil général<br><input type="checkbox"/> Associations<br><input type="checkbox"/> Je crée mes propres documents<br><input type="checkbox"/> Autre (veuillez préciser)<br>.....<br><input type="checkbox"/> Public health France<br><input type="checkbox"/> PNNS<br><input type="checkbox"/> ARS<br><input type="checkbox"/> IREPS<br><input type="checkbox"/> CAF<br><input type="checkbox"/> Pediatric societies (French Society of Pediatrics, Association of Outpatient Pediatrics, French Society of Nutrition, Academy of Medicine, other)<br><input type="checkbox"/> Milk and baby food manufacturers<br><input type="checkbox"/> Manufacturers of childcare equipment (e.g. breast pump)<br><input type="checkbox"/> General Council<br><input type="checkbox"/> Associations<br><input type="checkbox"/> I create my own documents<br><input type="checkbox"/> Other (please specify)<br>..... .. |
|     | Indiquez dans quelle mesure vous êtes d'accord avec les affirmations suivantes                                                                                                                                                                                                                   |                                                                                                                                                                                                                                                                                                                                                                                                                                                                                                                                                                                                                                                                                                                                                                                                                                                                                                                                                                                                                                                                                                                                                                                                                                                                                                                                                                                                                                                                                 |

|      |                                                                                                                                                                                                                                                                                                                                    |                                                                                                                                                                                                                                                                                                                                                                                                                                                             |
|------|------------------------------------------------------------------------------------------------------------------------------------------------------------------------------------------------------------------------------------------------------------------------------------------------------------------------------------|-------------------------------------------------------------------------------------------------------------------------------------------------------------------------------------------------------------------------------------------------------------------------------------------------------------------------------------------------------------------------------------------------------------------------------------------------------------|
|      | Indicate the extent to which you agree with the following statements                                                                                                                                                                                                                                                               |                                                                                                                                                                                                                                                                                                                                                                                                                                                             |
| 3.8  | <p>Je suis satisfait des documents sur la diversification alimentaire dont je dispose.</p> <p>I am satisfied with the documents on complementary feeding that I have.</p>                                                                                                                                                          | <input type="checkbox"/> Tout à fait d'accord<br><input type="checkbox"/> D'accord<br><input type="checkbox"/> Ni en désaccord ni d'accord<br><input type="checkbox"/> Pas d'accord<br><input type="checkbox"/> Pas du tout d'accord<br><input type="checkbox"/> Totally agree<br><input type="checkbox"/> Agree<br><input type="checkbox"/> Neither disagree nor agree<br><input type="checkbox"/> Disagree<br><input type="checkbox"/> Strongly disagree  |
| 3.9  | <p>Je pense que les documents que je remets aux parents suscitent leur intérêt pour la diversification alimentaire.</p> <p>I think that the documents that I give to parents arouse their interest in complementary feeding.</p>                                                                                                   | <input type="checkbox"/> Tout à fait d'accord<br><input type="checkbox"/> D'accord<br><input type="checkbox"/> Ni en désaccord, ni d'accord<br><input type="checkbox"/> Pas d'accord<br><input type="checkbox"/> Pas du tout d'accord<br><input type="checkbox"/> Totally agree<br><input type="checkbox"/> Agree<br><input type="checkbox"/> Neither disagree nor agree<br><input type="checkbox"/> Disagree<br><input type="checkbox"/> Strongly disagree |
| 3.10 | <p>Je pense que les documents que je remets aux parents permettent de tenir compte des différences culturelles et/ou financières propres à chaque famille.</p> <p>I think that the documents that I give to parents make it possible to take into account the cultural and / or financial differences specific to each family.</p> | <input type="checkbox"/> Tout à fait d'accord<br><input type="checkbox"/> D'accord<br><input type="checkbox"/> Ni en désaccord, ni d'accord<br><input type="checkbox"/> Pas d'accord<br><input type="checkbox"/> Pas du tout d'accord<br><input type="checkbox"/> Totally agree<br><input type="checkbox"/> Agree<br><input type="checkbox"/> Neither disagree nor agree<br><input type="checkbox"/> Disagree<br><input type="checkbox"/> Strongly disagree |

#### 4. Nouveaux plans et suggestions

##### 4. New plans and suggestions

|     |                                                                                                                                                                                                               |                                                                                                                                                                                                                      |
|-----|---------------------------------------------------------------------------------------------------------------------------------------------------------------------------------------------------------------|----------------------------------------------------------------------------------------------------------------------------------------------------------------------------------------------------------------------|
| 4.1 | <p>Hiérarchiser les caractéristiques suivantes de la plus importante à la moins importante pour des documents à destination des parents afin d'attirer leur attention sur la diversification alimentaire.</p> | <p>Le matériel que je donne devrait être :</p> <input type="checkbox"/> Clair<br><input type="checkbox"/> Synthétique<br><input type="checkbox"/> Détaillé<br><input type="checkbox"/> Axé sur les aspects pratiques |
|-----|---------------------------------------------------------------------------------------------------------------------------------------------------------------------------------------------------------------|----------------------------------------------------------------------------------------------------------------------------------------------------------------------------------------------------------------------|

|                                                                                                                                                     | <p>Prioritize the following characteristics from the most important to the least important for documents intended for parents in order to draw their attention to complementary feeding.</p>                                                                                                                                                                                                                                                                                                                                                                                                                                                                                                                                                                                                                                                                                                                                                                                                                                                                                                                                                                                                                                                                                                                                                                                                                                                                                                                                                                                                                                                                                                                                                                                                                                                                                                                                                                                             | <input type="checkbox"/> Facile à consulter<br><input type="checkbox"/> Illustré<br>The material I donate should be:<br><input type="checkbox"/> Clear<br><input type="checkbox"/> Synthetic<br><input type="checkbox"/> Detailed<br><input type="checkbox"/> Focused on practical aspects<br><input type="checkbox"/> Easy to consult<br><input type="checkbox"/> Illustrated |                                                              |                                                                |                                                                                         |  |  |                                                                                                                     |  |  |                                                                                                                                                     |  |  |                                                                                                  |  |  |                                                                      |  |  |                                                                                           |  |  |                                                                                       |  |  |                                                                                       |  |  |                                                                                            |  |  |  |
|-----------------------------------------------------------------------------------------------------------------------------------------------------|------------------------------------------------------------------------------------------------------------------------------------------------------------------------------------------------------------------------------------------------------------------------------------------------------------------------------------------------------------------------------------------------------------------------------------------------------------------------------------------------------------------------------------------------------------------------------------------------------------------------------------------------------------------------------------------------------------------------------------------------------------------------------------------------------------------------------------------------------------------------------------------------------------------------------------------------------------------------------------------------------------------------------------------------------------------------------------------------------------------------------------------------------------------------------------------------------------------------------------------------------------------------------------------------------------------------------------------------------------------------------------------------------------------------------------------------------------------------------------------------------------------------------------------------------------------------------------------------------------------------------------------------------------------------------------------------------------------------------------------------------------------------------------------------------------------------------------------------------------------------------------------------------------------------------------------------------------------------------------------|--------------------------------------------------------------------------------------------------------------------------------------------------------------------------------------------------------------------------------------------------------------------------------------------------------------------------------------------------------------------------------|--------------------------------------------------------------|----------------------------------------------------------------|-----------------------------------------------------------------------------------------|--|--|---------------------------------------------------------------------------------------------------------------------|--|--|-----------------------------------------------------------------------------------------------------------------------------------------------------|--|--|--------------------------------------------------------------------------------------------------|--|--|----------------------------------------------------------------------|--|--|-------------------------------------------------------------------------------------------|--|--|---------------------------------------------------------------------------------------|--|--|---------------------------------------------------------------------------------------|--|--|--------------------------------------------------------------------------------------------|--|--|--|
| 4.2                                                                                                                                                 | <p>Concernant les informations à transmettre aux parents à propos de la diversification alimentaire, merci de cocher si les sujets sont très importants ou moins importants selon vous.</p> <p>Regarding the information to be transmitted to parents about complementary feeding, please check if the subjects are very important or less important in your opinion.</p> <table border="1"> <thead> <tr> <th> <b>Sujets concernant la diversification alimentaire</b><br/> <b>Topics concerning complementary feeding</b> </th><th> <b>Sujets très importants</b><br/> <b>Very important topic</b> </th><th> <b>Sujets moins importants</b><br/> <b>Less important topics</b> </th></tr> </thead> <tbody> <tr> <td>Age de début de la diversification alimentaire<br/>Age of start of complementary feeding</td><td></td><td></td></tr> <tr> <td>Age d'introduction des différents groupes d'aliments<br/>Age and modalities of introduction of different food groups</td><td></td><td></td></tr> <tr> <td>Age d'introduction des aliments texturés et progression souhaitée<br/>Age and modalities of introduction of first food pieces and different textures</td><td></td><td></td></tr> <tr> <td>Stratégies de présentation en cas de refus alimentaire<br/>How to present food in case of refusal</td><td></td><td></td></tr> <tr> <td>Quantités et tailles des portions<br/>Portions sizes of food and milk</td><td></td><td></td></tr> <tr> <td>Stratégies alimentaires en cas de « petit mangeur »<br/>How to deal with “little” appetite</td><td></td><td></td></tr> <tr> <td>Stratégies alimentaires en cas de « gros mangeur »<br/>How to deal with “big” appetite</td><td></td><td></td></tr> <tr> <td>Observations du comportement des nourrissons<br/>How to interpret the child's behavior</td><td></td><td></td></tr> <tr> <td>Comment nourrir un enfant pour favoriser le développement de saines habitudes alimentaires</td><td></td><td></td></tr> </tbody> </table> | <b>Sujets concernant la diversification alimentaire</b><br><b>Topics concerning complementary feeding</b>                                                                                                                                                                                                                                                                      | <b>Sujets très importants</b><br><b>Very important topic</b> | <b>Sujets moins importants</b><br><b>Less important topics</b> | Age de début de la diversification alimentaire<br>Age of start of complementary feeding |  |  | Age d'introduction des différents groupes d'aliments<br>Age and modalities of introduction of different food groups |  |  | Age d'introduction des aliments texturés et progression souhaitée<br>Age and modalities of introduction of first food pieces and different textures |  |  | Stratégies de présentation en cas de refus alimentaire<br>How to present food in case of refusal |  |  | Quantités et tailles des portions<br>Portions sizes of food and milk |  |  | Stratégies alimentaires en cas de « petit mangeur »<br>How to deal with “little” appetite |  |  | Stratégies alimentaires en cas de « gros mangeur »<br>How to deal with “big” appetite |  |  | Observations du comportement des nourrissons<br>How to interpret the child's behavior |  |  | Comment nourrir un enfant pour favoriser le développement de saines habitudes alimentaires |  |  |  |
| <b>Sujets concernant la diversification alimentaire</b><br><b>Topics concerning complementary feeding</b>                                           | <b>Sujets très importants</b><br><b>Very important topic</b>                                                                                                                                                                                                                                                                                                                                                                                                                                                                                                                                                                                                                                                                                                                                                                                                                                                                                                                                                                                                                                                                                                                                                                                                                                                                                                                                                                                                                                                                                                                                                                                                                                                                                                                                                                                                                                                                                                                             | <b>Sujets moins importants</b><br><b>Less important topics</b>                                                                                                                                                                                                                                                                                                                 |                                                              |                                                                |                                                                                         |  |  |                                                                                                                     |  |  |                                                                                                                                                     |  |  |                                                                                                  |  |  |                                                                      |  |  |                                                                                           |  |  |                                                                                       |  |  |                                                                                       |  |  |                                                                                            |  |  |  |
| Age de début de la diversification alimentaire<br>Age of start of complementary feeding                                                             |                                                                                                                                                                                                                                                                                                                                                                                                                                                                                                                                                                                                                                                                                                                                                                                                                                                                                                                                                                                                                                                                                                                                                                                                                                                                                                                                                                                                                                                                                                                                                                                                                                                                                                                                                                                                                                                                                                                                                                                          |                                                                                                                                                                                                                                                                                                                                                                                |                                                              |                                                                |                                                                                         |  |  |                                                                                                                     |  |  |                                                                                                                                                     |  |  |                                                                                                  |  |  |                                                                      |  |  |                                                                                           |  |  |                                                                                       |  |  |                                                                                       |  |  |                                                                                            |  |  |  |
| Age d'introduction des différents groupes d'aliments<br>Age and modalities of introduction of different food groups                                 |                                                                                                                                                                                                                                                                                                                                                                                                                                                                                                                                                                                                                                                                                                                                                                                                                                                                                                                                                                                                                                                                                                                                                                                                                                                                                                                                                                                                                                                                                                                                                                                                                                                                                                                                                                                                                                                                                                                                                                                          |                                                                                                                                                                                                                                                                                                                                                                                |                                                              |                                                                |                                                                                         |  |  |                                                                                                                     |  |  |                                                                                                                                                     |  |  |                                                                                                  |  |  |                                                                      |  |  |                                                                                           |  |  |                                                                                       |  |  |                                                                                       |  |  |                                                                                            |  |  |  |
| Age d'introduction des aliments texturés et progression souhaitée<br>Age and modalities of introduction of first food pieces and different textures |                                                                                                                                                                                                                                                                                                                                                                                                                                                                                                                                                                                                                                                                                                                                                                                                                                                                                                                                                                                                                                                                                                                                                                                                                                                                                                                                                                                                                                                                                                                                                                                                                                                                                                                                                                                                                                                                                                                                                                                          |                                                                                                                                                                                                                                                                                                                                                                                |                                                              |                                                                |                                                                                         |  |  |                                                                                                                     |  |  |                                                                                                                                                     |  |  |                                                                                                  |  |  |                                                                      |  |  |                                                                                           |  |  |                                                                                       |  |  |                                                                                       |  |  |                                                                                            |  |  |  |
| Stratégies de présentation en cas de refus alimentaire<br>How to present food in case of refusal                                                    |                                                                                                                                                                                                                                                                                                                                                                                                                                                                                                                                                                                                                                                                                                                                                                                                                                                                                                                                                                                                                                                                                                                                                                                                                                                                                                                                                                                                                                                                                                                                                                                                                                                                                                                                                                                                                                                                                                                                                                                          |                                                                                                                                                                                                                                                                                                                                                                                |                                                              |                                                                |                                                                                         |  |  |                                                                                                                     |  |  |                                                                                                                                                     |  |  |                                                                                                  |  |  |                                                                      |  |  |                                                                                           |  |  |                                                                                       |  |  |                                                                                       |  |  |                                                                                            |  |  |  |
| Quantités et tailles des portions<br>Portions sizes of food and milk                                                                                |                                                                                                                                                                                                                                                                                                                                                                                                                                                                                                                                                                                                                                                                                                                                                                                                                                                                                                                                                                                                                                                                                                                                                                                                                                                                                                                                                                                                                                                                                                                                                                                                                                                                                                                                                                                                                                                                                                                                                                                          |                                                                                                                                                                                                                                                                                                                                                                                |                                                              |                                                                |                                                                                         |  |  |                                                                                                                     |  |  |                                                                                                                                                     |  |  |                                                                                                  |  |  |                                                                      |  |  |                                                                                           |  |  |                                                                                       |  |  |                                                                                       |  |  |                                                                                            |  |  |  |
| Stratégies alimentaires en cas de « petit mangeur »<br>How to deal with “little” appetite                                                           |                                                                                                                                                                                                                                                                                                                                                                                                                                                                                                                                                                                                                                                                                                                                                                                                                                                                                                                                                                                                                                                                                                                                                                                                                                                                                                                                                                                                                                                                                                                                                                                                                                                                                                                                                                                                                                                                                                                                                                                          |                                                                                                                                                                                                                                                                                                                                                                                |                                                              |                                                                |                                                                                         |  |  |                                                                                                                     |  |  |                                                                                                                                                     |  |  |                                                                                                  |  |  |                                                                      |  |  |                                                                                           |  |  |                                                                                       |  |  |                                                                                       |  |  |                                                                                            |  |  |  |
| Stratégies alimentaires en cas de « gros mangeur »<br>How to deal with “big” appetite                                                               |                                                                                                                                                                                                                                                                                                                                                                                                                                                                                                                                                                                                                                                                                                                                                                                                                                                                                                                                                                                                                                                                                                                                                                                                                                                                                                                                                                                                                                                                                                                                                                                                                                                                                                                                                                                                                                                                                                                                                                                          |                                                                                                                                                                                                                                                                                                                                                                                |                                                              |                                                                |                                                                                         |  |  |                                                                                                                     |  |  |                                                                                                                                                     |  |  |                                                                                                  |  |  |                                                                      |  |  |                                                                                           |  |  |                                                                                       |  |  |                                                                                       |  |  |                                                                                            |  |  |  |
| Observations du comportement des nourrissons<br>How to interpret the child's behavior                                                               |                                                                                                                                                                                                                                                                                                                                                                                                                                                                                                                                                                                                                                                                                                                                                                                                                                                                                                                                                                                                                                                                                                                                                                                                                                                                                                                                                                                                                                                                                                                                                                                                                                                                                                                                                                                                                                                                                                                                                                                          |                                                                                                                                                                                                                                                                                                                                                                                |                                                              |                                                                |                                                                                         |  |  |                                                                                                                     |  |  |                                                                                                                                                     |  |  |                                                                                                  |  |  |                                                                      |  |  |                                                                                           |  |  |                                                                                       |  |  |                                                                                       |  |  |                                                                                            |  |  |  |
| Comment nourrir un enfant pour favoriser le développement de saines habitudes alimentaires                                                          |                                                                                                                                                                                                                                                                                                                                                                                                                                                                                                                                                                                                                                                                                                                                                                                                                                                                                                                                                                                                                                                                                                                                                                                                                                                                                                                                                                                                                                                                                                                                                                                                                                                                                                                                                                                                                                                                                                                                                                                          |                                                                                                                                                                                                                                                                                                                                                                                |                                                              |                                                                |                                                                                         |  |  |                                                                                                                     |  |  |                                                                                                                                                     |  |  |                                                                                                  |  |  |                                                                      |  |  |                                                                                           |  |  |                                                                                       |  |  |                                                                                       |  |  |                                                                                            |  |  |  |

|     |                                                                                                                                                                                                                                                                                                                                                                                                                                                            |                                                                                                                  |                                                                                                                               |
|-----|------------------------------------------------------------------------------------------------------------------------------------------------------------------------------------------------------------------------------------------------------------------------------------------------------------------------------------------------------------------------------------------------------------------------------------------------------------|------------------------------------------------------------------------------------------------------------------|-------------------------------------------------------------------------------------------------------------------------------|
|     | How to feed a child to promote the development of healthy eating habits                                                                                                                                                                                                                                                                                                                                                                                    |                                                                                                                  |                                                                                                                               |
|     | Exemples de menus ou de recettes<br>Examples of menus and recipes                                                                                                                                                                                                                                                                                                                                                                                          |                                                                                                                  |                                                                                                                               |
| 4.3 | Concernant les informations à transmettre aux parents à propos de la diversification alimentaire, merci de cocher si vous voulez plus d'information ou si vous avez déjà suffisamment d'information en ce qui concerne les sujets suivants.<br><br>Regarding the information to be transmitted to parents about complementary feeding, please check if you want more information or if you already have enough information regarding the following topics. |                                                                                                                  |                                                                                                                               |
|     | <b>Sujets concernant la diversification alimentaire</b><br><b>Topics concerning complementary feeding</b>                                                                                                                                                                                                                                                                                                                                                  | <b>Sujets pour lesquels j'ai besoin de plus d'information</b><br><b>Topics for which I need more information</b> | <b>Sujets pour lesquels j'ai déjà suffisamment d'information</b><br><b>Topics for which I already have enough information</b> |
|     | Age de début de la diversification alimentaire<br>Age of start of complementary feeding                                                                                                                                                                                                                                                                                                                                                                    |                                                                                                                  |                                                                                                                               |
|     | Age d'introduction des différents groupes d'aliments<br>Age and modalities of introduction of different food groups                                                                                                                                                                                                                                                                                                                                        |                                                                                                                  |                                                                                                                               |
|     | Age d'introduction des aliments texturés et progression souhaitée<br>Age and modalities of introduction of first food pieces and different textures                                                                                                                                                                                                                                                                                                        |                                                                                                                  |                                                                                                                               |
|     | Stratégies de présentation en cas de refus alimentaire<br>How to present food in case of refusal                                                                                                                                                                                                                                                                                                                                                           |                                                                                                                  |                                                                                                                               |
|     | Quantités et tailles des portions<br>Portions sizes of food and milk                                                                                                                                                                                                                                                                                                                                                                                       |                                                                                                                  |                                                                                                                               |
|     | Stratégies alimentaires en cas de « petit mangeur »<br>How to deal with “little” appetite                                                                                                                                                                                                                                                                                                                                                                  |                                                                                                                  |                                                                                                                               |
|     | Stratégies alimentaires en cas de « gros mangeur »<br>How to deal with “big” appetite                                                                                                                                                                                                                                                                                                                                                                      |                                                                                                                  |                                                                                                                               |

|     |                                                                                                                                                                                                                                                                                                                                                                                                                                                                                                 |                                                                                                                                                                                                                                                                                                                                                                                                                                                                                                                                                                                                                                                                                                                                                                                                                                                                                                                                                                                                                                                                                                                                                                                                                                                                                                                                                                                                                                                                                   |       |
|-----|-------------------------------------------------------------------------------------------------------------------------------------------------------------------------------------------------------------------------------------------------------------------------------------------------------------------------------------------------------------------------------------------------------------------------------------------------------------------------------------------------|-----------------------------------------------------------------------------------------------------------------------------------------------------------------------------------------------------------------------------------------------------------------------------------------------------------------------------------------------------------------------------------------------------------------------------------------------------------------------------------------------------------------------------------------------------------------------------------------------------------------------------------------------------------------------------------------------------------------------------------------------------------------------------------------------------------------------------------------------------------------------------------------------------------------------------------------------------------------------------------------------------------------------------------------------------------------------------------------------------------------------------------------------------------------------------------------------------------------------------------------------------------------------------------------------------------------------------------------------------------------------------------------------------------------------------------------------------------------------------------|-------|
|     | Observations du comportement des nourrissons<br><a href="#">How to interpret the child's behavior</a>                                                                                                                                                                                                                                                                                                                                                                                           |                                                                                                                                                                                                                                                                                                                                                                                                                                                                                                                                                                                                                                                                                                                                                                                                                                                                                                                                                                                                                                                                                                                                                                                                                                                                                                                                                                                                                                                                                   |       |
|     | Comment nourrir un enfant pour favoriser le développement de saines habitudes alimentaires<br><a href="#">How to feed a child to promote the development of healthy eating habits</a>                                                                                                                                                                                                                                                                                                           |                                                                                                                                                                                                                                                                                                                                                                                                                                                                                                                                                                                                                                                                                                                                                                                                                                                                                                                                                                                                                                                                                                                                                                                                                                                                                                                                                                                                                                                                                   |       |
|     | Exemples de menus ou de recettes<br><a href="#">Examples of menus and recipes</a>                                                                                                                                                                                                                                                                                                                                                                                                               |                                                                                                                                                                                                                                                                                                                                                                                                                                                                                                                                                                                                                                                                                                                                                                                                                                                                                                                                                                                                                                                                                                                                                                                                                                                                                                                                                                                                                                                                                   |       |
| 4.4 | <p>En dehors des discussions que vous pouvez mener en face à face, quels sont les outils de communication que vous considérez comme étant les plus accessibles et plus susceptibles d'attirer l'attention des parents aujourd'hui ?<br/>(plusieurs réponses possibles)</p> <p><a href="#">Aside from face-to-face discussions, which communication tools do you consider the most accessible and most likely to grab the attention of parents today?</a><br/>(more than one answer allowed)</p> | <input type="checkbox"/> Brochures<br><input type="checkbox"/> Télévision<br><input type="checkbox"/> Radio<br><input type="checkbox"/> Sites internet<br><input type="checkbox"/> YouTube<br><input type="checkbox"/> Réseaux sociaux (Facebook, Instagram, Twitter, Pinterest)<br><input type="checkbox"/> Applications pour smartphone<br><input type="checkbox"/> Blogs<br><input type="checkbox"/> Forums de discussion<br><input type="checkbox"/> Chats (Des chats individuels offrent la possibilité d'échanger en temps réel et en privé avec un intervenant)<br><input type="checkbox"/> Coups de téléphone à des amis ou parents / grands-parents<br><input type="checkbox"/> <a href="#">Brochures</a><br><input type="checkbox"/> <a href="#">Television</a><br><input type="checkbox"/> <a href="#">Radio</a><br><input type="checkbox"/> <a href="#">Websites</a><br><input type="checkbox"/> <a href="#">YouTube</a><br><input type="checkbox"/> <a href="#">Social networks (Facebook, Instagram, Twitter, Pinterest)</a><br><input type="checkbox"/> <a href="#">Smartphone applications</a><br><input type="checkbox"/> <a href="#">Blogs</a><br><input type="checkbox"/> <a href="#">Discussion forums</a><br><input type="checkbox"/> <a href="#">Chats (Individual chats offer the possibility of discussing in real time and in private with a speaker)</a><br><input type="checkbox"/> <a href="#">Phone calls to friends or relatives / grandparents</a> |       |
| 4.5 | Avez-vous d'autres suggestions (en termes de contenu et de format) concernant les outils de                                                                                                                                                                                                                                                                                                                                                                                                     | .....                                                                                                                                                                                                                                                                                                                                                                                                                                                                                                                                                                                                                                                                                                                                                                                                                                                                                                                                                                                                                                                                                                                                                                                                                                                                                                                                                                                                                                                                             | ..... |

|                                                                                                                                                                                                                                                 |              |
|-------------------------------------------------------------------------------------------------------------------------------------------------------------------------------------------------------------------------------------------------|--------------|
| <p>communication sur la diversification alimentaire à fournir aux parents ?</p> <p>Do you have any other suggestion (in terms of content and format) concerning the communication tools on complementary feeding to be provided to parents?</p> | <p>.....</p> |
|-------------------------------------------------------------------------------------------------------------------------------------------------------------------------------------------------------------------------------------------------|--------------|

**Question facultative : Avez-vous d'autres suggestions (en termes de contenu et de format) concernant les outils de communication sur la diversification alimentaire à fournir aux parents ?**

**Optional question: Do you have any other suggestion (in terms of content and format) concerning the communication tools on complementary feeding to be provided to parents?**

.....

.....

**Merci d'avoir pris le temps de remplir ce questionnaire !**  
**Thank you for taking the time to complete this questionnaire!**
